# Supplementary material for: Direct effects of transcranial electric stimulation on brain circuits in rats and humans
Source: PubMed Central journal article supplement (PMC5797140; doi:10.1038/s41467-018-02928-3), 2018-02-02
Supplement: 41467_2018_2928_MOESM1_ESM.pdf [file 41467_2018_2928_MOESM1_ESM.pdf]

## Supplementary Information

### Direct effects of transcranial electric stimulation on brain circuits in rats and humans

Mihály Vöröslakos<sup>1,4</sup>, Yuichi Takeuchi<sup>1</sup>, Kitti Brinyiczki<sup>2</sup>, Tamás Zombori<sup>2</sup>, Azahara Oliva<sup>1,4</sup>, Antonio Fernández-Ruiz<sup>1,4</sup>, Gábor Kozák<sup>1</sup>, Zsigmond T. Kincses<sup>3</sup>, Béla Iványi<sup>2</sup>, György Buzsáki<sup>4,5,6</sup>, Antal Berényi<sup>1,4</sup>

<sup>1</sup>MTA-SZTE “Momentum” Oscillatory Neuronal Networks Research Group, Department of Physiology,  
University of Szeged, Szeged, Hungary

<sup>2</sup>Department of Pathology, University of Szeged, Szeged, Hungary

<sup>3</sup>Department of Neurology, University of Szeged, Szeged, Hungary

<sup>4</sup>The Neuroscience Institute, <sup>5</sup>Department of Neurology and <sup>6</sup>Center for Neural Science,  
New York University, New York, New York 10016

| #    | Age  | Sex | Weight (kg) | Post-mortem age (day) | Brain water (%) | Brain weight (g) | Skull circumference (cm) | Skull thickness (mm) |     |     |     |     |     |     |     | Cause of death                               |
|------|------|-----|-------------|-----------------------|-----------------|------------------|--------------------------|----------------------|-----|-----|-----|-----|-----|-----|-----|----------------------------------------------|
|      |      |     |             |                       |                 |                  |                          | L1                   | L2  | L3  | L4  | R1  | R2  | R3  | R4  |                                              |
| 1/18 | 94   | M   | 43          | 3                     | 80.37           | 1235             | 50.7                     | 6                    | 7   | 5   | 6   | 5   | 5   | 4   | 6   | Bronchopneumonia                             |
| 1/19 | 86   | M   | 59          | 6                     | 81.56           | 1360             | 52.3                     | 4                    | 4   | 4   | 3   | 3   | 5   | 4   | 4   | Bronchopneumonia                             |
| 1/20 | 87   | F   | 67          | 8                     | 78.29           | 1115             | 49                       | 6                    | 6   | 5   | 4   | 5   | 4   | 4   | 5   | Klatschkin-tumor                             |
| 1/21 | 92   | F   | 54          | 7                     | 81.01           | 1075             | 49.8                     | 8                    | 6   | 5   | 5   | 9   | 4   | 6   | 4   | Heart failure                                |
| 2/2  | 94   | M   | 58          | 5                     | 82.57           | 1105             | 47.8                     | 6                    | 5   | 4   | 5   | 6   | 6   | 4   | 4   | Heart failure                                |
| 2/3  | 65   | M   | 57          | 5                     | 82.94           | 1025             | -                        | -                    | -   | -   | -   | -   | -   | -   | -   | Acute myeloid leukemia                       |
| 2/4  | 67   | M   | 53          | 7                     | 80.49           | 1340             | 50.8                     | 4                    | 4   | 4   | 5   | 3   | 5   | 4   | 6   | Lung adenocarcinoma                          |
| 3/2  | 82   | F   | 51          | 4                     | 78.95           | 1200             | 49.5                     | 4                    | 3   | 5   | 6   | 4   | 4   | 5   | 6   | Pancreas adenocarcinoma                      |
| 3/3  | 76   | F   | 78          | 7                     | 83.15           | 1210             | 52                       | 9                    | 6   | 4   | 6   | 9   | 5   | 5   | 6   | Pulmonary embolism                           |
| 3/4  | 94   | F   | 45          | 3                     | 83.87           | 1105             | 49.2                     | 10                   | 4   | 4   | 6   | 3   | 5   | 5   | 3   | Bronchopneumonia                             |
| 3/5  | 88   | F   | 62          | 3                     | 81.73           | 1220             | 50.5                     | 10                   | 5   | 6   | 4   | 3   | 4   | 4   | 5   | Bronchopneumonia                             |
| 3/6  | 69   | F   | 43          | 3                     | 86.36           | 1225             | -                        | -                    | -   | -   | -   | -   | -   | -   | -   | Bronchopneumonia                             |
| 3/s1 | 80   | F   | 120         | 6                     | 83.33           | 1210             | 49.6                     | 6                    | 5   | 3   | 4   |     |     |     |     | Invasive ductal adenocarcinoma of the breast |
| 3/s2 | 59   | F   | 78          | 7                     | -               | 1120             | 50.4                     | 6                    | 4   | 4   | 5   |     |     |     |     | Heart failure                                |
| 4/1  | 82   | M   | -           | 3                     | 88.77           | 1455             | 54                       | -                    | 5   | -   | -   | -   | 4   | -   | -   | Hypovolemic shock                            |
| 4/2  | 73   | M   | -           | 7                     | 81.54           | 1255             | 51.8                     | -                    | 5   | -   | -   | -   | 5   | -   | -   | Bronchopneumonia                             |
| 4/3  | 80   | M   | -           | 2                     | 87              | 1480             | 54.2                     | -                    | 4   | -   | -   | -   | 4   | -   | -   | Acute myocardial infarction                  |
| Mean | 80.5 |     | 62          | 5.1                   | 82.6            | 1219.7           | 50.8                     | 6.6                  | 4.9 | 4.4 | 4.9 | 5.0 | 4.6 | 4.5 | 4.9 |                                              |

Supplementary Table 1. **Anthropometric data of the cadavers.**

L1-4 and R1-4 refer to the 4 location of stimulating electrodes on the left and right sides, respectively. L1 and R1 denote the two most frontal locations.

| Analysis                        | Figure        | 1/18 | 1/19 | 1/20 | 1/21 | 2/2 | 2/3 | 2/4 | 3/2 | 3/3 | 3/4 | 3/5 | 3/6 | 3/s1 | 3/s2 | 4/1 | 4/2 | 4/3 |
|---------------------------------|---------------|------|------|------|------|-----|-----|-----|-----|-----|-----|-----|-----|------|------|-----|-----|-----|
| Stimulus intensity              | Figure 4e     | x    | x    | x    | x    |     |     |     |     |     |     |     |     |      |      |     |     |     |
| Stimulus frequency              | Figure 4f     |      |      |      |      |     |     |     | x   | x   | x   | x   | x   |      |      |     |     |     |
| Electrode size                  | Figure 4g     |      |      |      |      |     |     |     | x   | x   |     |     |     |      |      |     |     |     |
| Voltage-current relationship    | Figure 5b     | x    | x    | x    | x    | x   | x   | x   | x   | x   |     |     | x   |      |      |     |     |     |
| Transcutaneous vs. subcutaneous | Figure 5c-f   |      | x    |      |      | x   | x   | x   | x   | x   |     |     | x   |      |      | x   | x   | x   |
| Subcutaneous vs. Epidural stim. | Figure 5e-f   |      |      |      |      |     |     |     |     |     | x   | x   | x   |      |      |     |     |     |
| Skull thickness                 | Figure 5g     | x    | x    | x    | x    |     |     |     | x   | x   | x   | x   |     |      |      |     |     |     |
| DC vs. AC stimulation           | Supp. Fig. 4  |      |      | x    | x    |     |     |     |     |     |     |     |     |      |      |     |     |     |
| Coronal plane                   | Supp. Fig. 5  |      |      |      |      | x   |     |     |     |     |     |     |     |      |      |     |     |     |
| Stimulation mode                | Supp. Fig. 6a |      |      |      |      | x   |     |     |     |     |     |     |     |      |      |     |     |     |
| Phase shift                     | Supp. Fig. 6c | x    |      | x    | x    |     |     |     |     |     |     |     |     |      |      |     |     |     |
| Fronto-lateral arrangement      | Supp. Fig. 7  |      |      |      |      |     |     |     |     |     |     |     |     | x    | x    |     |     |     |
| Skull thickness                 | Supp. Fig. 8  | x    | x    | x    | x    |     |     |     | x   | x   | x   | x   |     |      |      |     |     |     |

Supplementary Table 2. **Overview of the experiments and analyses performed on individual cadavers**

| Figure                 | Stimulation waveform | Intensity                             | Frequency                                 | Stimulation electrode surface (mm <sup>2</sup> ) | Number of stimulation electrode pairs | Targeted hemisphere | Remarks |
|------------------------|----------------------|---------------------------------------|-------------------------------------------|--------------------------------------------------|---------------------------------------|---------------------|---------|
| Figure 1a              | Sine                 | 3 V                                   | 1000                                      | 4                                                | 3                                     | NA                  |         |
| Figure 1b (example)    | Sine                 | 3V                                    | 1000                                      | 4                                                | 1                                     | NA                  |         |
| Figure 1b (population) | Sine                 | 3V                                    | 10,20, 50, 100, 200, 500, 1000, 2000      | 4                                                | 1                                     | NA                  |         |
| Figure 1d, e           | Sine                 | 10, 20, 50, 100, 200 $\mu$ A          | 10, 100, 1000                             | 4                                                | 1                                     | NA                  |         |
| Figure 2               | DC                   | $\pm$ 100, 200, 400, 600, 800 $\mu$ A | NA                                        | 4                                                | 1                                     | NA                  | (1)     |
| Figure 3               | ISP                  | 5V, 200 $\mu$ A                       | NA                                        | 3.6                                              | 3                                     | Left or right       | (2)     |
| Figure 4d              | Sine                 | 5V                                    | 100                                       | 78                                               | 4                                     | NA                  |         |
| Figure 4e              | Sine                 | 1, 2, 3, 4, 5V                        | 200                                       | 78                                               | 1                                     | NA                  |         |
| Figure 4f              | Sine                 | 5V                                    | 5, 10, 20, 50, 100, 200, 500, 1000, 2000, | 78                                               | 1                                     | NA                  |         |
| Figure 4g              | Sine                 | 5V                                    | 1000                                      | 78                                               | 6                                     | NA                  |         |
| Figure 5c              | Sine                 | 5V                                    | 200                                       | 78                                               | 4                                     | NA                  | (3)     |
| Figure 5d              | Sine                 |                                       |                                           |                                                  | 2                                     | NA                  | (3)     |
| Figure 6, 7g           | ISP                  | 1.5, 3, 4.5, 6, 7.5 mA                | 1                                         | 200                                              | 6                                     | Midline             | (4)     |
| Figure 7a-f            | ISP                  | 2, 4.5, 7, 9 mA                       | 1                                         | 200                                              | 6                                     | Midline             |         |
| Figure 8               | ISP                  | 2, 6 mA                               | 1                                         | 200                                              | 6                                     | Midline / N/A       |         |
| Supp. Fig. 1b          | ISP                  | 7 mA                                  | 1                                         | 200                                              | 6                                     | Midline             |         |
| Supp. Fig. 1c          | ISP                  | 2, 9 mA                               | 1                                         | 200                                              | 6                                     | Midline             |         |
| Supp. Fig. 4           | DC / Sine            | 5V                                    | NA / 200                                  | 78                                               | 1                                     | NA                  |         |
| Supp. Fig. 5           | Sine                 | 5V                                    | 1000                                      | 78                                               | 4                                     | NA                  |         |
| Supp. Fig. 6a          | Sine                 | 1, 3, 5V / 50, 100, 150 $\mu$ A       | 1000                                      | 78                                               | 1                                     | NA                  |         |
| Supp. Fig. 6c          | Sine                 | 5V                                    | 100                                       | 78                                               | 2                                     | NA                  |         |
| Supp. Fig. 7           | Sine                 | 4V                                    | 10, 20, 100, 200, 1000                    | 78                                               | 3                                     | NA                  |         |
| Supp. Fig. 8           | Sine                 | 5V                                    | 100                                       | 78                                               | 1                                     | NA                  |         |
| Supp. Fig. 9d          | Sine                 | 1V                                    | 100                                       | 4                                                | 1                                     | NA                  |         |
| Supp. Fig. 10          | ISP                  | 1.5, 3, 4.5, 6, 7.5 mA                | 1                                         | 200                                              | 6                                     | Midline             |         |

**Supplementary Table 3. Overview of stimulation parameters for each experiment and figure.**

Notes below explain the rationale for the choice of stimulation parameters in different experiments.

- (1) In contrast to the human measurements, neuron stability and brain state changes limited the duration of the experiment available for rodent data collection. In the intracellular experiments, we chose DC stimulation (right side was the cathode) because artifact issues are easier to deal with DC stimulation (only onset and offset artifacts had to be removed). In experiments where sine waves were used, the positive half of the sine wave corresponded to left-anodal stimulation, while the negative half to the right-anode.
- (2) Each trial consisted of 3 x 2.5  $\mu$ s pulses repeated at 133 kHz (100% duty cycle) for 500 ms and followed by 1 s pause (see also Supplementary Figure 2a).
- (3) To achieve high signal-to-noise ratio in the cadaver experiments, we first identified the strongest stimulation intensity, which did not saturate the amplifier. This variability across brains should not affect our results since we demonstrate a nearly perfect linear correlation between with the applied intensity and induced fields (Figure 4). In a subset of experiments, we used the same intensity (1 mA) for scalp, skull and brain surface stimulation (Figure 5).
- (4) In the human ISP experiments, 6 x 10  $\mu$ s pulses were repeated at 16.66 kHz (100% duty cycle). The amplitude of the pulses was modulated by a 1-Hz sine wave, linearly ramping up from zero to maximum in 6 seconds, then ramping down to zero in 6 seconds (see also Supplementary Figure 2b).

| Subjects             | Pain**       |                | Phosphenes |                | Dizziness |                | Metallic taste |                |
|----------------------|--------------|----------------|------------|----------------|-----------|----------------|----------------|----------------|
|                      | ISP>Shuffled | Shuffled > ISP | ISP (6mA)  | Shuffled (6mA) | ISP (6mA) | Shuffled (6mA) | ISP (6mA)      | Shuffled (6mA) |
| III/1                | No           | Yes            | Yes        | No             | Mild      | No             | Yes            | No             |
| III/2                | No           | Yes            | Yes        | No             | Mild      | No             | Yes            | No             |
| III/3                | No           | Yes            | Yes        | No             | Mild      | No             | Yes            | No             |
| III/4                | No           | Yes            | Yes        | No             | Mild      | No             | Yes            | No             |
| III/5                | No           | Yes            | Yes        | No             | Mild      | No             | Yes            | No             |
| III/6                | No           | Yes            | Yes        | No             | Mild      | No             | Yes            | No             |
| III/7*               | No           | Yes            | Yes        | No             | Mild      | No             | Yes            | No             |
|                      |              |                |            |                |           |                |                |                |
| III/2 (eyes open)    | No           | Yes            | Yes        | No             | Moderate  | No             | Yes            | No             |
| III/4 (eyes open)    | No           | Yes            | Yes        | No             | Strong    | No             | Yes            | No             |
| III/6*** (eyes open) | No           | Yes            | Yes        | No             | Strong    | No             | Yes            | No             |

Supplementary Table 4. **Comparison of subjective report of 'ISP' and 'Shuffled ISP' stimulation-induced effects in human subjects.**

After each 5-min stimulation epoch, the subjects were asked: did you see 'sparks'? Did you feel dizzy? Did you feel taste in your mouth? What was it like? Subjects were not asked to give a magnitude but they spontaneously reported mild, moderate and strong dizziness.

In three subjects (III/2, III/4 and III/6 – eyes open sessions) the protocol was repeated while they were asked to keep the eyes open for both the stimulation and control periods. These sessions were used to further estimate the severity of dizziness during ISP and Shuffled ISP protocols only, and were not included in the analysis of EEG. Note that all three subjects reported more severe dizziness compared to the eyes closed sessions, and in one occasion an altered peripheral vision. These side effects were completely absent when the Shuffled ISP protocol was applied.

\* This subject was excluded from the analysis due to excessive electrical artefacts.

\*\*At the termination of both ISP and Shuffled stimulations the subjects were asked: Which epoch was more unpleasant, the first or the second?

\*\*\* This subject reported altered peripheral vision at 2 mA ISP but not at 7 mA.

Subjective discomfort varied from mild sensation to burning feeling of the scalp but its magnitude was not quantified.

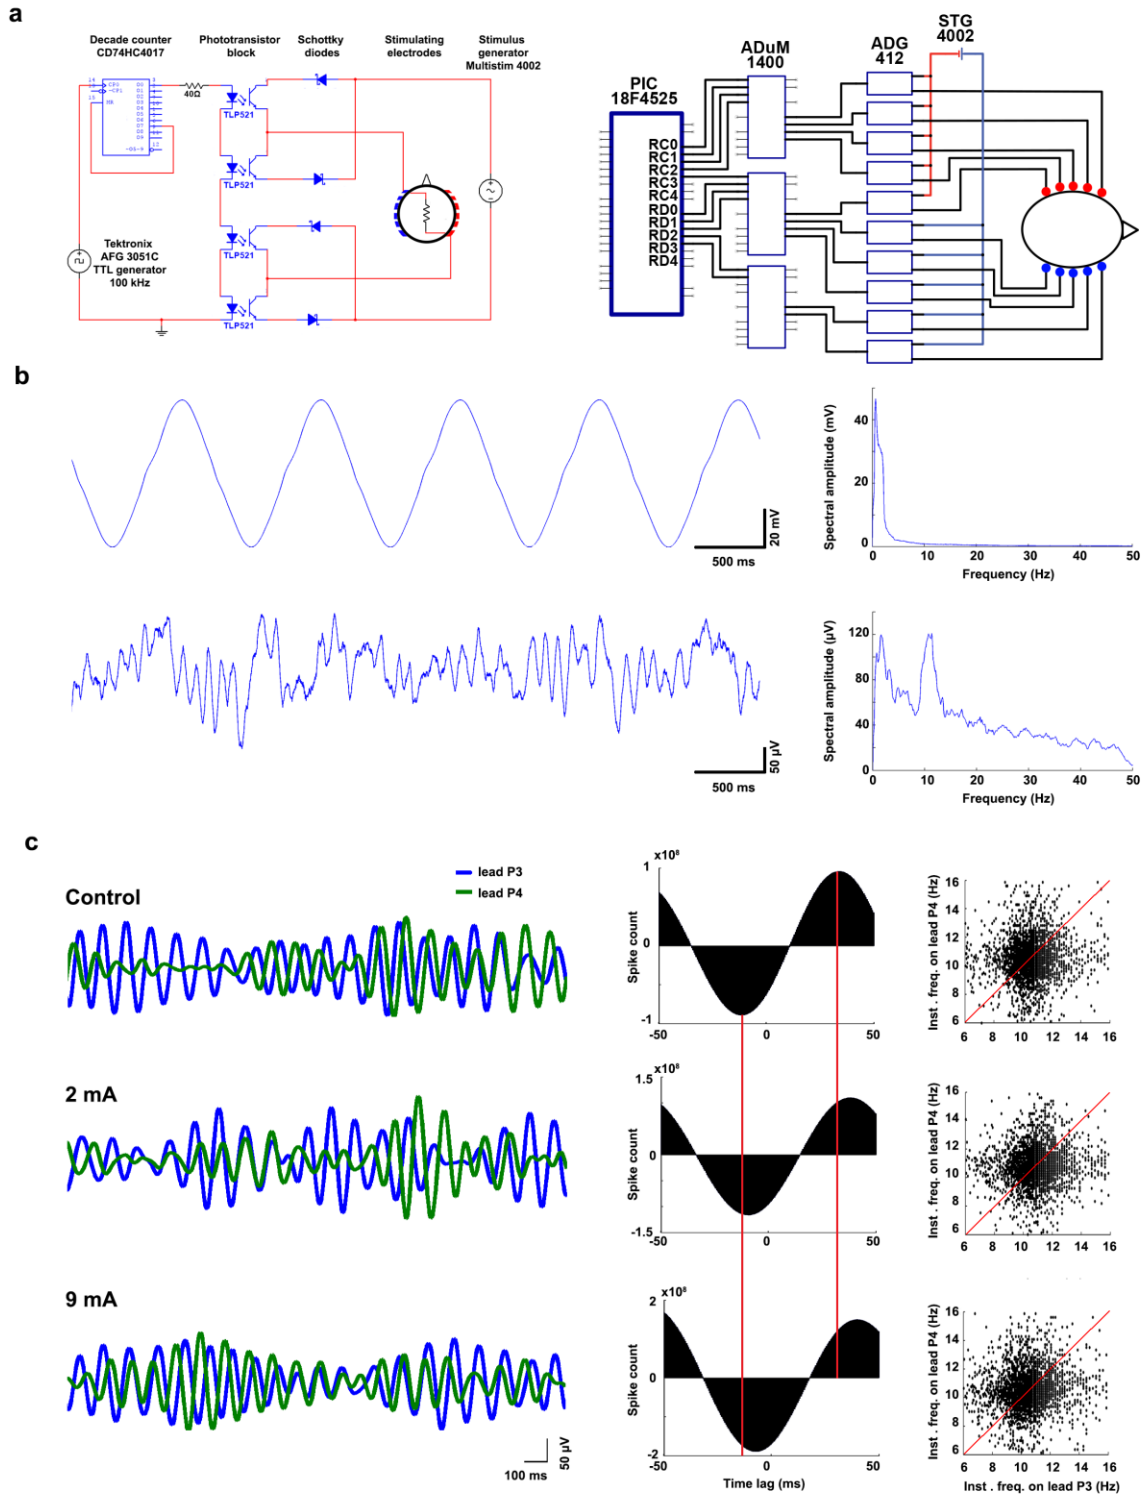

Supplementary Figure 1. **Circuit schematics of ISP Stimulator and artefact removal.**

**(a)** Left: Schematics of fast-pulse ground-independent signal-splitter circuit for one electrode pair. Driver TTL signal is generated by an external pulse generator, which is advancing a decade counter. Counter is driving six identical bipolar switching modules, each built of four phototransistors. Right: An alternative solution used a microcontroller (Microchip PIC18F4525) and digital isolators (ADuM1400) that allow more flexibility of stimulation patterns. Ground-independent switching is performed by high-speed analog switches (ADG412) instead of phototransistors. **(b)** EEG traces during ISP stimulation. Example trace showing EEG recording before (top left trace) and after artefact removal (bottom trace). Right panels: corresponding power spectra of EEG traces shown on the left. Stimulus intensity = 7 mA. **(c)** Alpha-band filtered EEG signals recorded by the left and right

occipital leads (left panels). Note that the phase and amplitude of alpha waves in the two hemispheres vary relatively independently from each other under both control and ISP stimulation (2 mA and 9 mA) conditions, implying that the traces are free of common electrical artefacts. Time-lag of cross-correlogram peaks is also similar under control and ISP stimulation conditions (red vertical bars denote correlogram peak and trough of the 0 mA condition for better visibility). Instantaneous frequencies of the EEG traces from the two hemispheres vary from event to event (Pearson's linear correlation;  $R = -0.0024, 0.01$  and  $-0.004$ ;  $P = 0.89, 0.57, 0.82$ ;  $n = 3053, 3092$  and  $3098$  from a single subject, at 0, 2 and 9 mA intensities, respectively). Note that stimulation-induced artefacts are expected to have constant phase and amplitude ratios at all recording positions. Full data distributions are shown on the scatter plots.

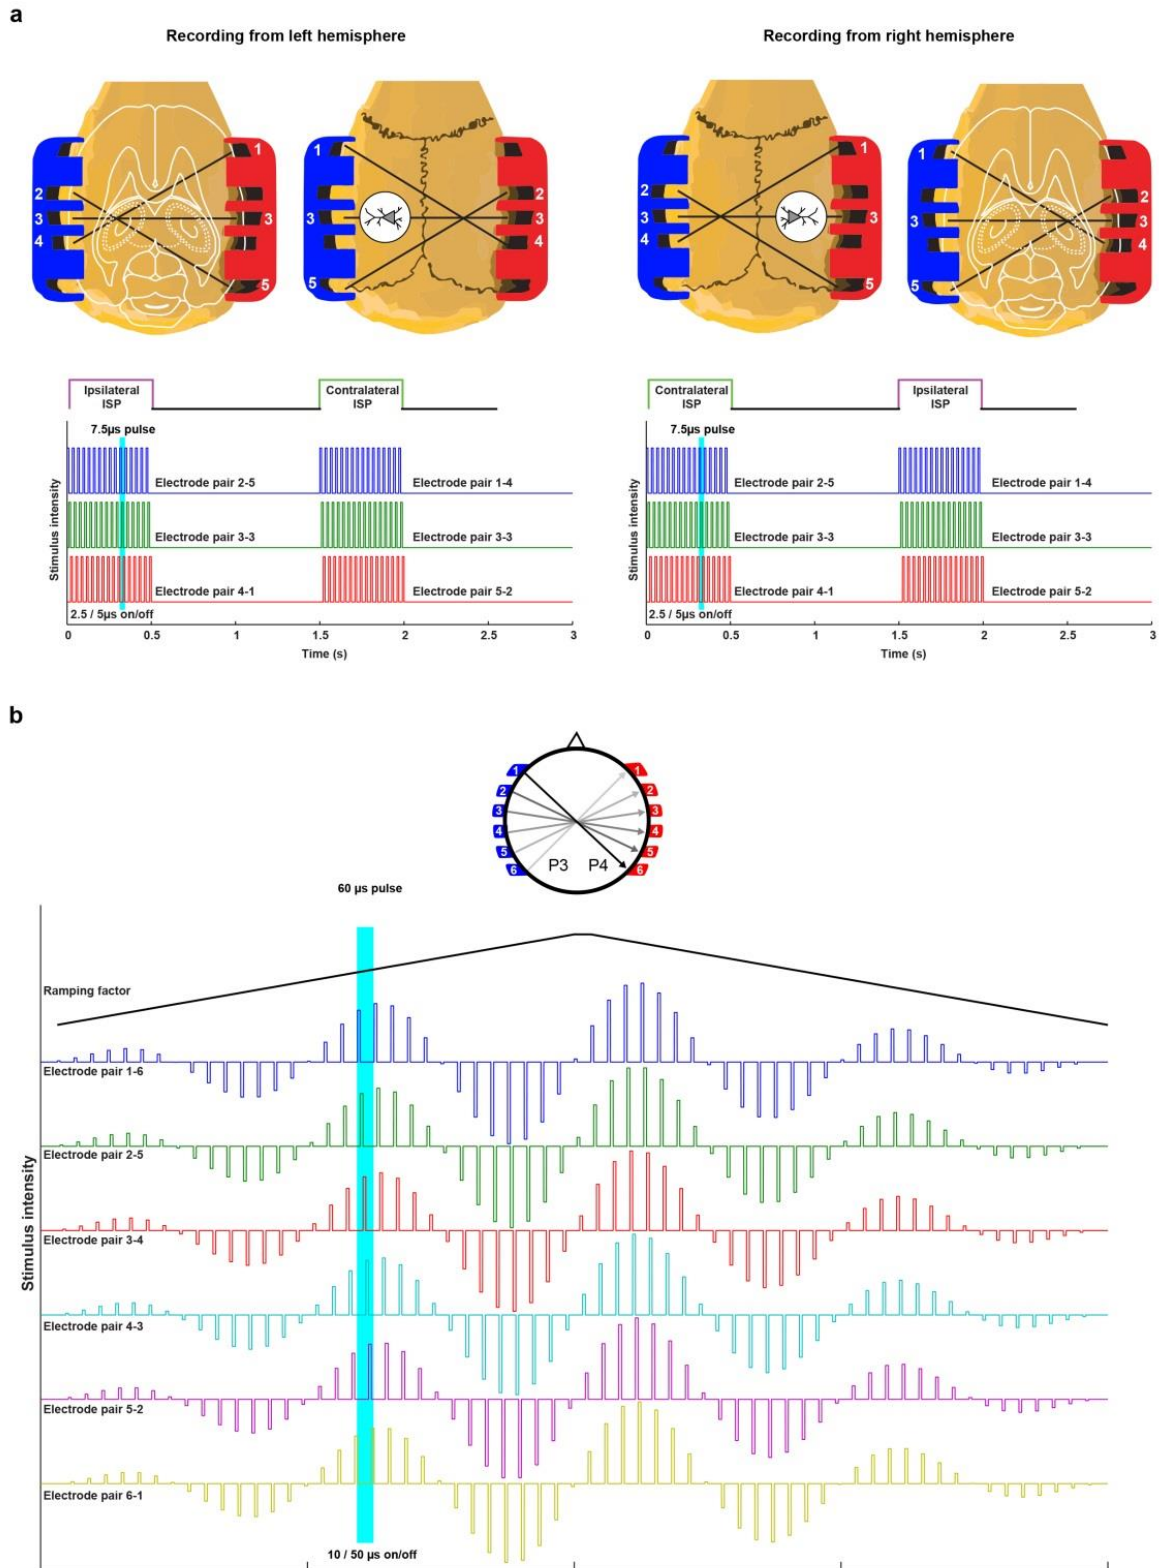

Supplementary Figure 2. **Illustration of ISP protocol.**

**(a)** Upper part shows the schematics of the recording and stimulating setup in rodent experiments. Neuronal activity was recorded from both hemispheres simultaneously (white circles corresponds the location of craniotomies). The ISP was alternatingly focused to left or right hemisphere in an interwoven fashion, so that neurons in the left (or right) hemisphere were more strongly modulated by ISP focused to the left (or right) hemisphere. Spiking activity of some neurons contralateral to the focused hemisphere was suppressed, possibly because of the opposite geometric orientation of neurons compared to the ipsilateral hemisphere (note the different orientation of the schematic



neuron in the white circle). Lower part shows the schematics of the stimulation sequence for two consecutive trials. Each trial consisted of 3 x 2.5  $\mu$ s pulses repeated at 133 kHz (100% duty cycle) for 500 ms and followed by 1 s pause (Supplementary Table 3). Note that the duration of the 2.5  $\mu$ s pulses are shown disproportionately longer for better visibility. **(b)** Upper part shows the position of the recording (P3 and P4) and stimulating electrodes in human measurements. Lower part shows a single trial, which consisted of 6 x 10  $\mu$ s pulses repeated at 16.66 kHz (100% duty cycle). The amplitude of the pulses was modulated by a 1-Hz sine wave, linearly ramping up from zero to maximum in 6 seconds, then ramping down to zero in 6 seconds. Please note that the length of the 10  $\mu$ s pulses and the ramping time are shown disproportionately for better visibility.

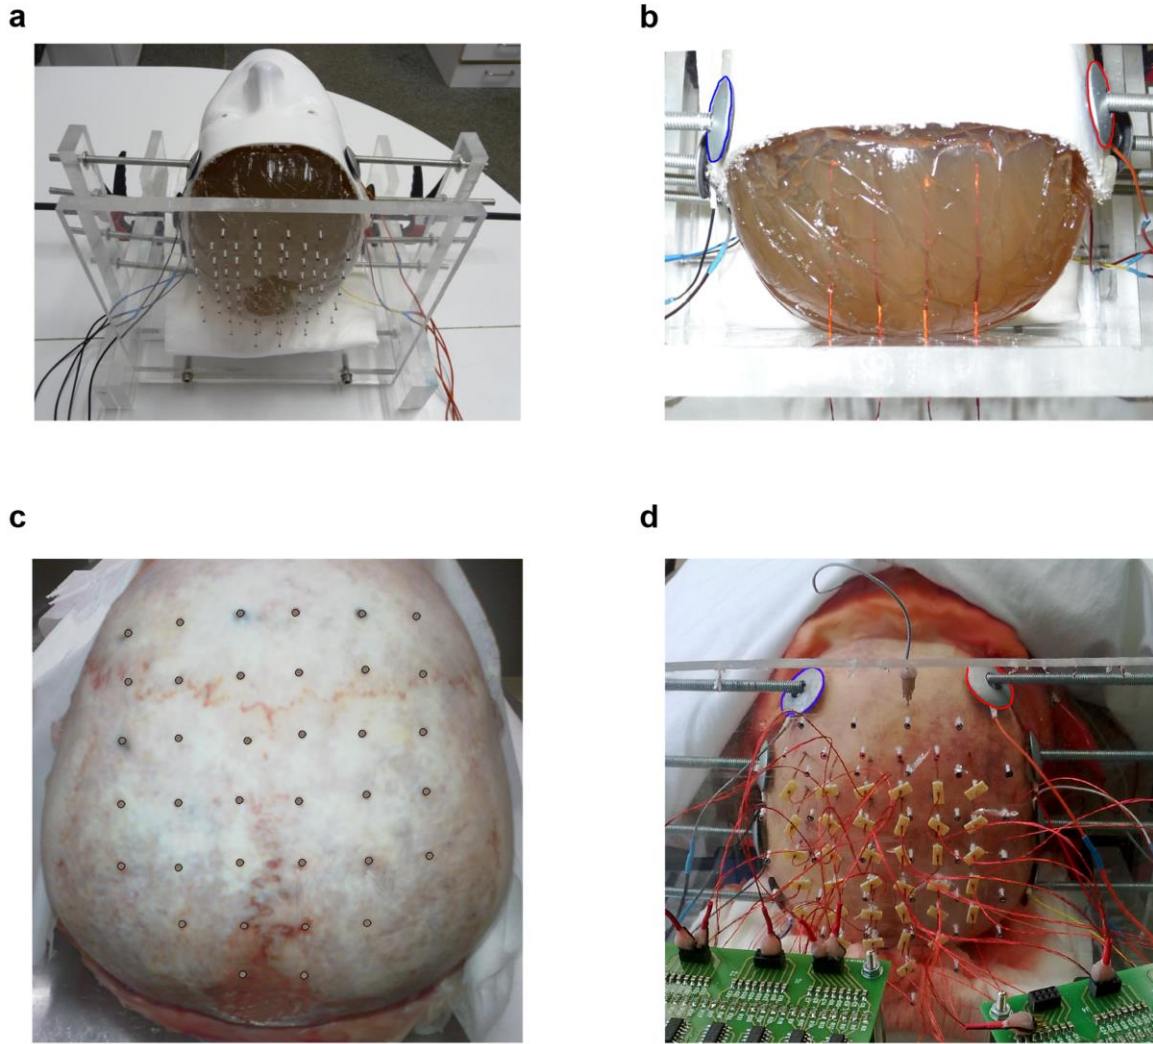

Supplementary Figure 3. **Photographs of cadaver recording arrangements.**

Supporting plexiglass frame with pre-drilled holes for electrode positioning **(a)**, and recording electrode penetration in a jelly mannequin brain **(b)**. **(c)** Locations of holes drilled to introduce recording electrodes ( $n = 36$ ). **(d)** Set up for intracranial voltage measurements with transcranial stimulation. Stimulation electrodes are marked with red and blue circles.

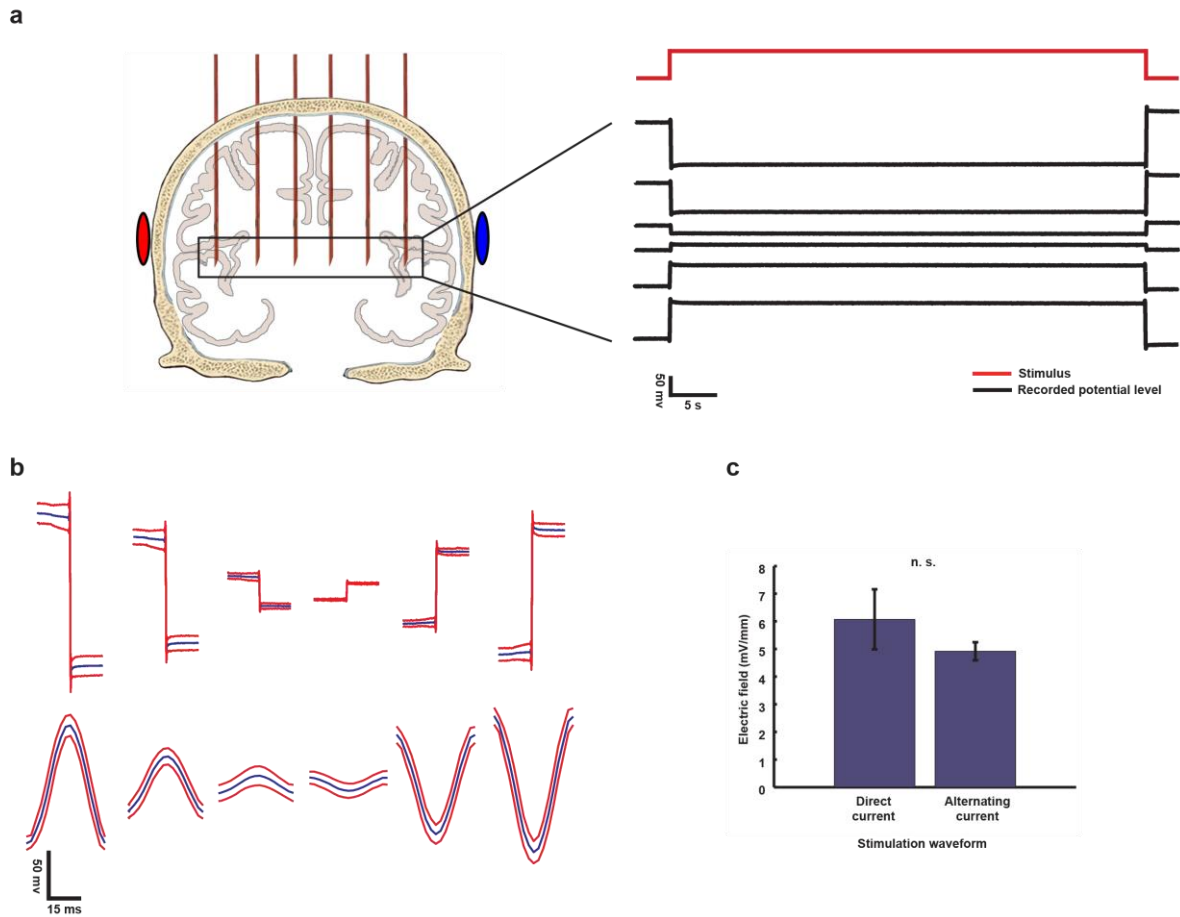

**Supplementary Figure 4. TES generates constant electric fields over time.**

**(a)** Schematic drawing of the location of six recording electrode sites spanning the extent of the brain and the stimulation electrode pair. Representative traces of voltage signals recorded on the six contact sites (black) and the delivered stimulus waveform (red). Long (50 s) DC pulses and measured voltage changes indicate ohmic properties of the tissues **(b)** Comparison of tDCS and 20 Hz tACS using identical currents resulted in quantitatively similar intracerebral peak potential values on the six recording sites ( $n = 40$  repetitions in 2 cadavers, 5V, mean  $\pm$  2 SD). The effect of tDCS was recorded using Ag/AgCl electrodes to prevent electrode polarization. tACS response was recorded with metal (Nicrothal) electrodes. Stimuli were delivered through Ag/AgCl electrodes in both cases. **(c)** Mean electric fields were similar for both tDCS and tACS application (Stimulus intensity = 5V,  $P = 0.12$ , Mann-Whitney U-test,  $N = 10$  from two cadavers).

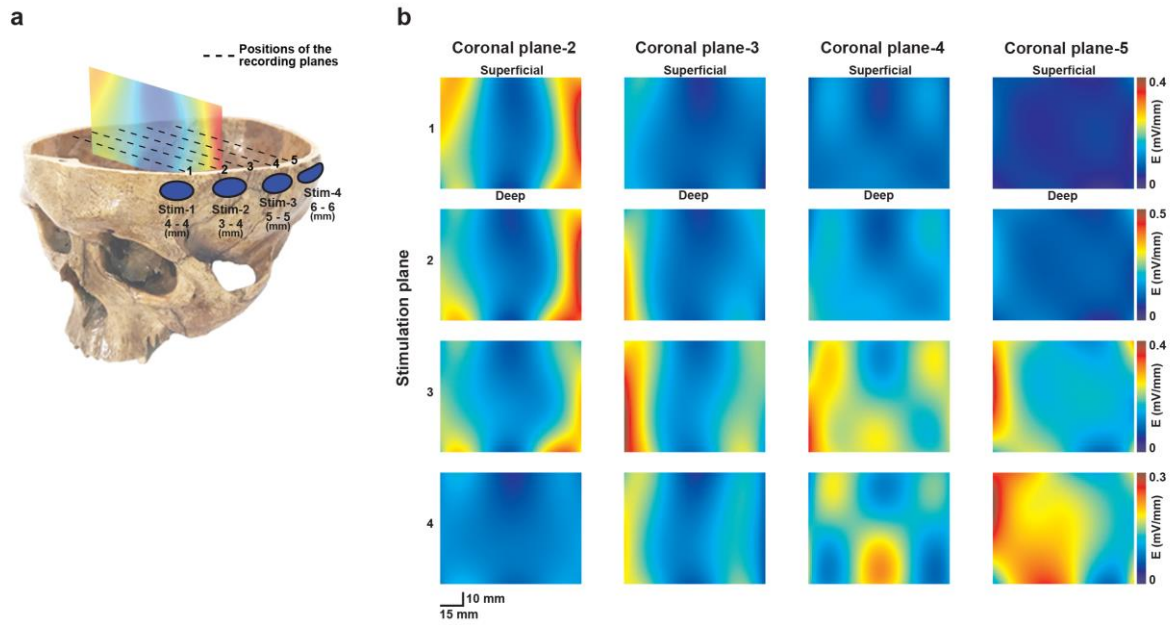

Supplementary Figure 5. **Intracerebral electric fields are affected by stimulation electrode locations.**

**(a)** Schematic drawing of recording planes (dashed lines) and the positions of the stimulating electrode pairs. Numbers below the ellipsoids indicate the skull thickness at the stimulation electrodes. **(b)** Largest gradients did appear in the coronal planes of the stimulating electrodes. Note different color calibrations for different maps. The left versus right asymmetry and the different magnitude fields may be explained by the different thickness of the skull at the various coronal planes.

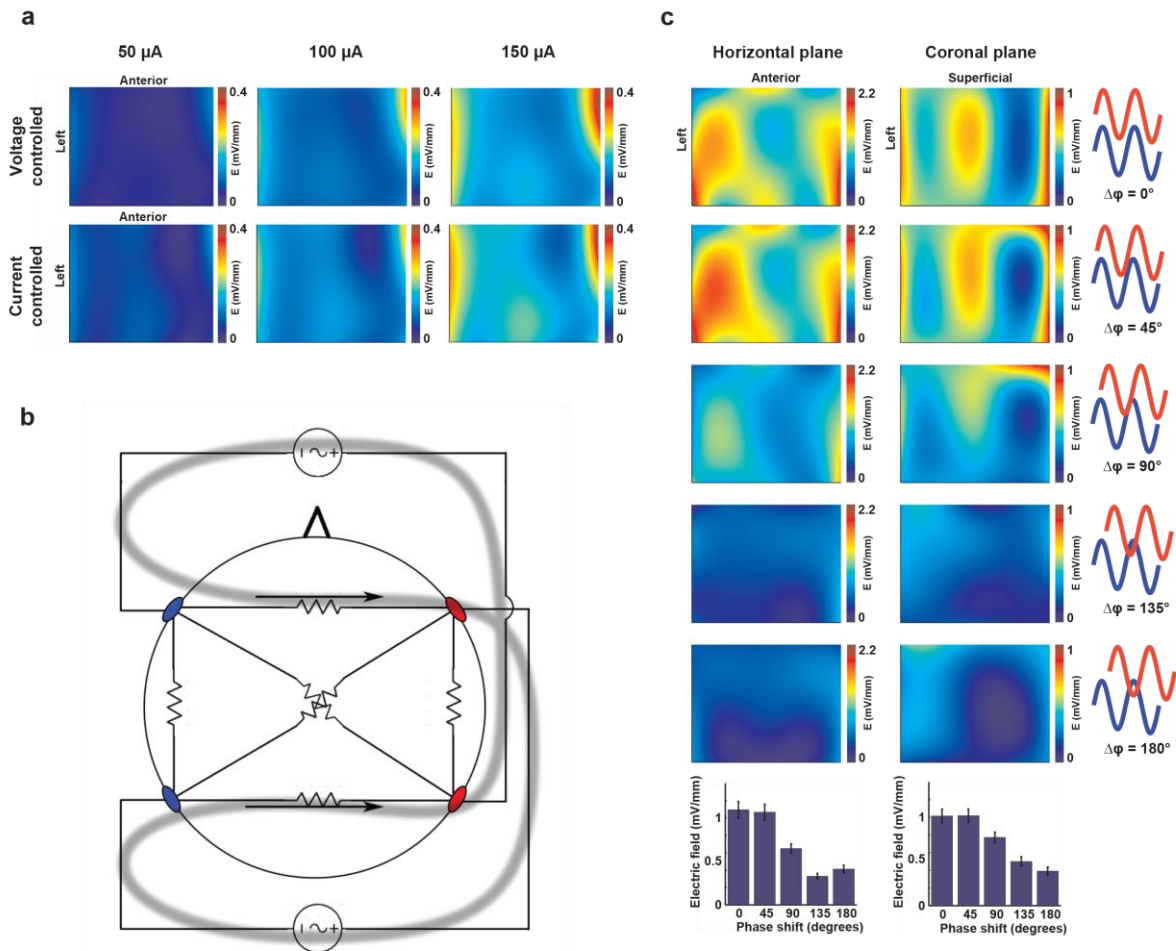

Supplementary Figure 6. **Multiple simultaneous stimulator pairs do not focus the intracerebral electric gradients.**

**(a)** Current and voltage mode stimulations result in identical effects. Single session example shows distribution maps with voltage mode (upper row, 1, 3 and 5 V from left to right, respectively), and current mode (lower row, 50, 100 and 150  $\mu$ A intensities from left to right, respectively). Intensities for current mode stimulation were chosen to match the calculated current intensity in voltage mode stimulation sessions (see Materials and Methods). Note identical distribution maps. **(b)** Equivalent circuit schematic for the application of multiple independent stimulating pairs in an intersectional arrangement, resembling gamma-ray radiosurgery. Note that due to the common conductive medium, the currents from the two stimulators couple serially, mimicking the effect of one large surface electrode pair and/or increased stimulus intensity, but they don't reach spatial selectivity **(c)** As predicted from the model on panel **b**, shifting the relative phase of the sinusoidal stimuli from two independent stimulator pairs reduce the induced field in both the horizontal and coronal planes. Bottom graphs: peak voltage gradient values as a function of phase shift both in the horizontal (left column,  $n = 60$  gradient values in 3 cadavers) and coronal plane (right column,  $n = 60$  gradient values in 3 cadavers).

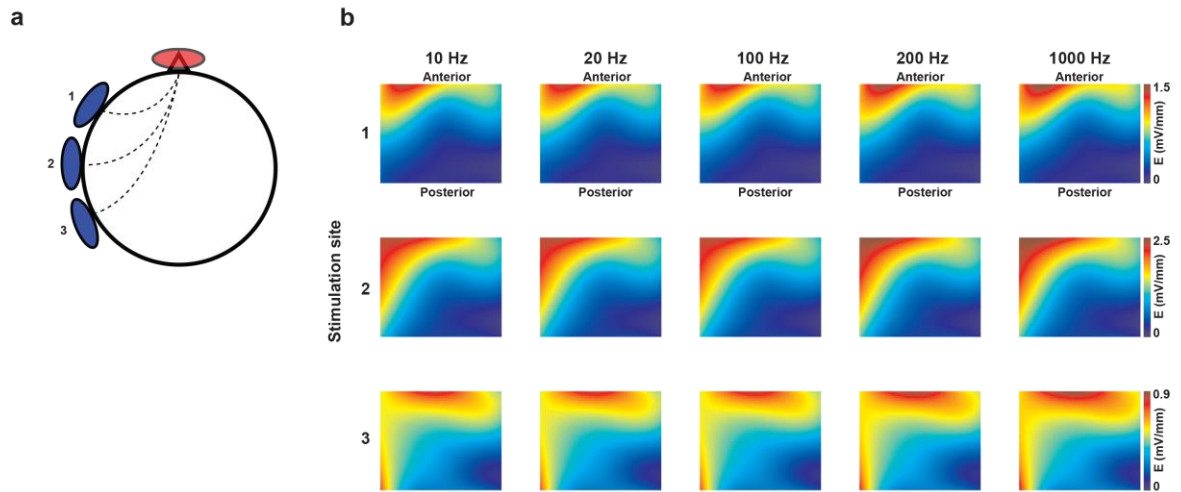

Supplementary Figure 7. **The effect of electrode arrangement on the spatial distribution of induced field.**

**(a)** Schematic of transcranial electrode locations in a cadaver. Red ellipse, cathode placed on the forehead in the sagittal plane; blue ellipses, positions of three anode locations. **(b)** Intracerebral voltage gradient maps; each row corresponds to one anodal location. Note the frequency independence (columns) of the gradient maps. Different inter-electrode distances induced variable size and shape of field distributions.

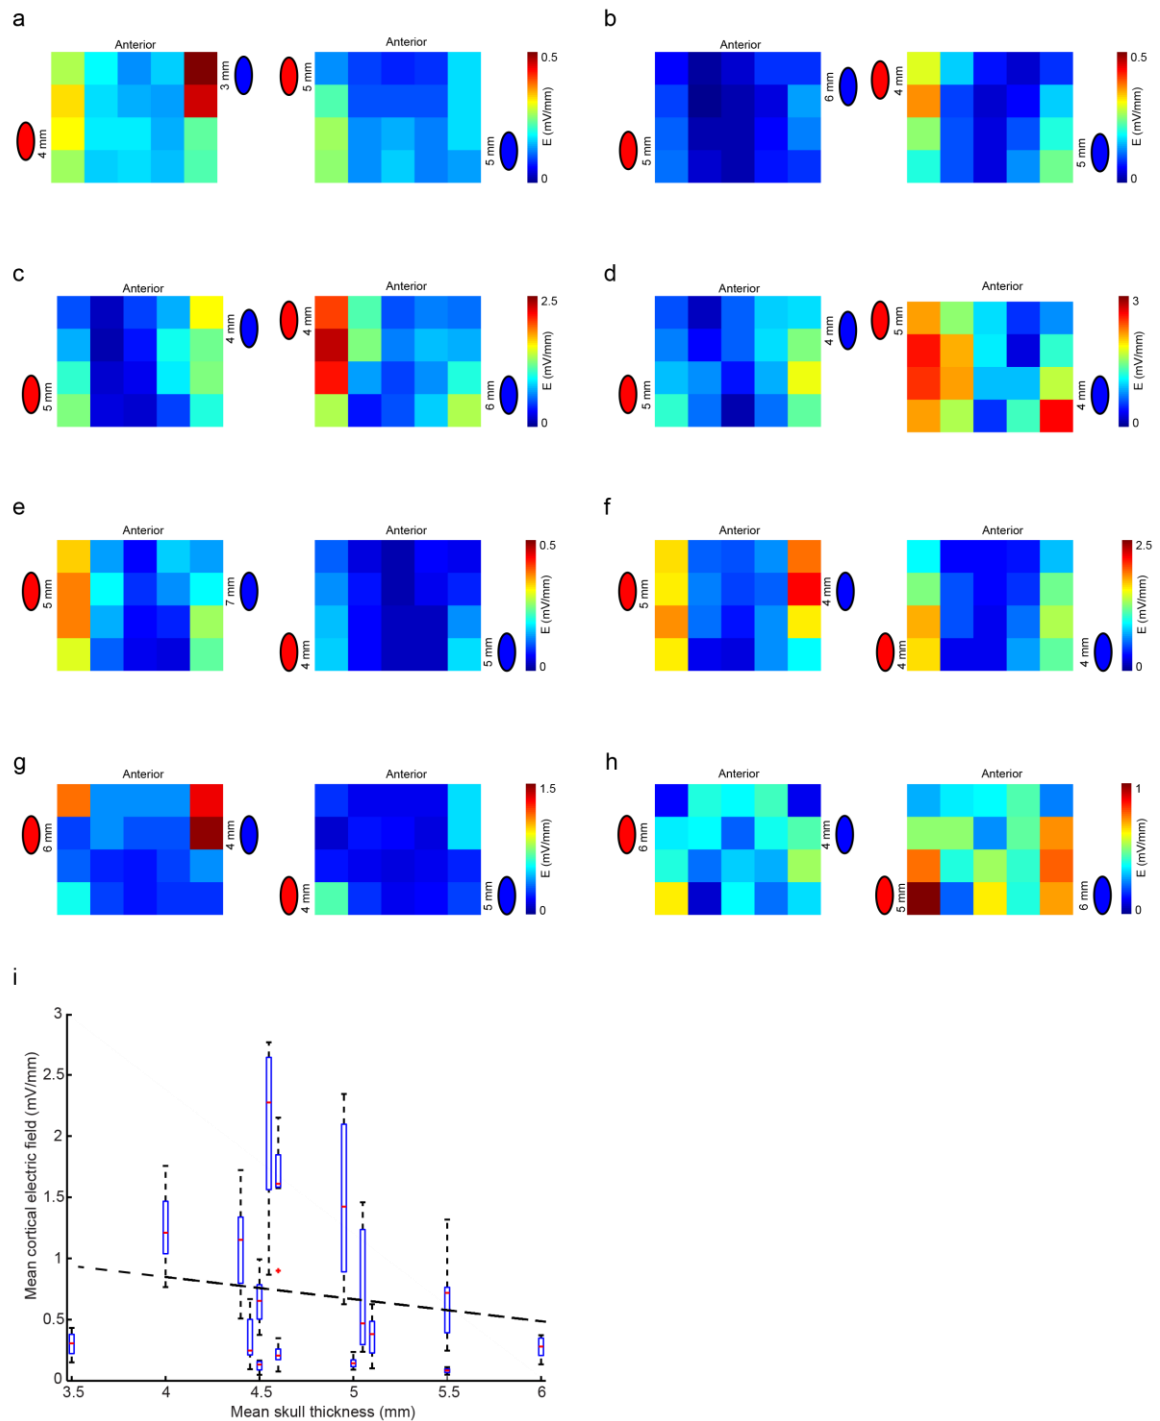

**Supplementary Figure 8. Effect of skull thickness on the electric field magnitude and distribution.** (a - h) Intracerebral voltage gradient maps (horizontal plane) of #3/2 – #3/5 and #1/18 – #1/21 cadavers. Cathode (red ellipse) and anode (blue ellipse) were placed bilaterally on the skull. The numbers below the ellipses indicate the skull thickness under the stimulating electrode. Different stimulation electrode locations and/or skull thicknesses induced electric field distributions with variable size and shape in the brain. Note the different color calibrations for the different cadavers (a – h). (i) Median and interquartile range of the mean cortical electric field (four 'cortical' values on each of the two sides) as a function of mean skull thickness for two conditions in each cadaver ( $n = 8$ ). Increasing skull thickness is decreasing the magnitude of electric field in the brain (Pearson's linear correlation;  $R = -0.2332$ ;  $P < 0.05$ ;  $n = 128$  cortical electric field intensities from 8 cadavers.).

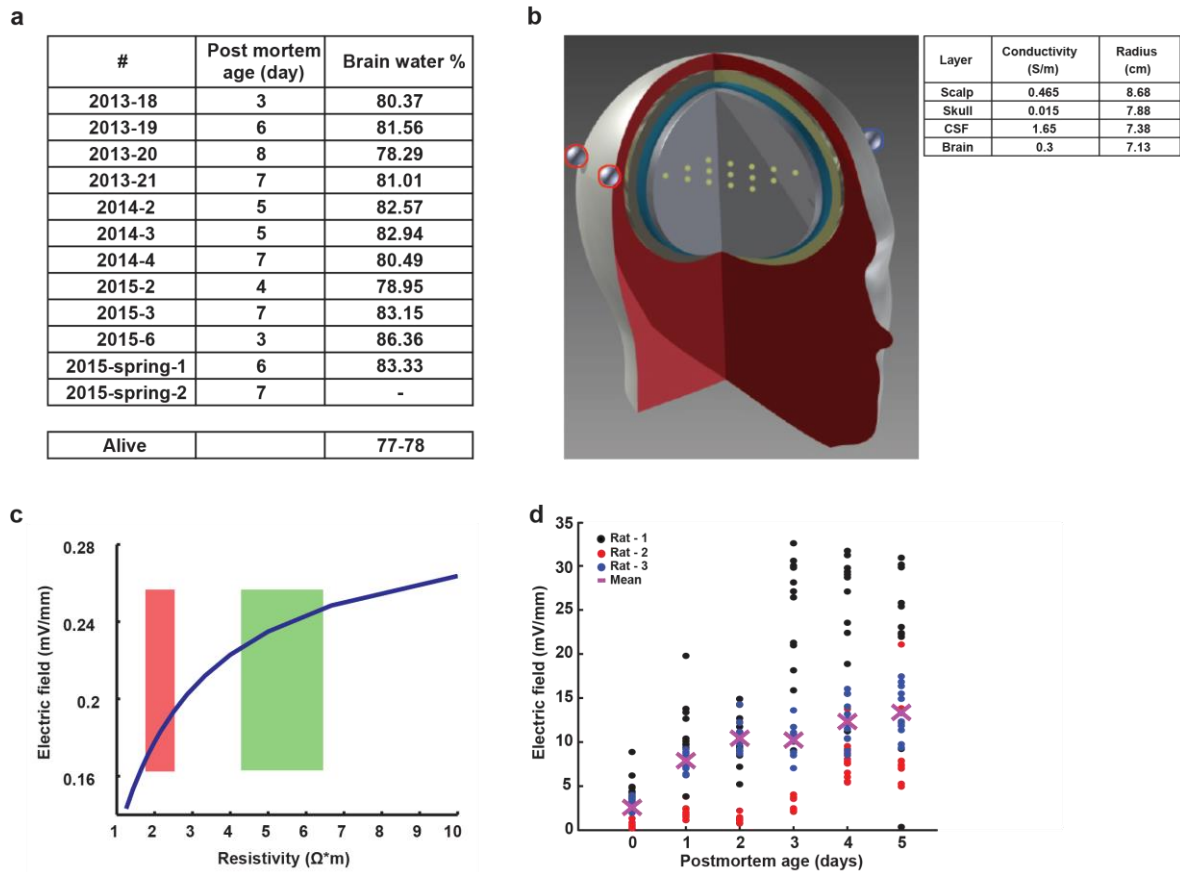

Supplementary Figure 9. **Comparison of cadaver and in vivo conditions.**

**(a)** Water content of brain specimens did not change significantly over post mortem days, indicating that the cadaver brains did not undergo significant desiccation. For comparison, literature value for in vivo hydration level is shown, too ('Alive'). **(b)** Schematics and parameters of the finite element model used for simulations. Positions of the virtual recording electrodes were arranged to match the cadaver recording locations. Conductivity and radius values for the concentric geometries are shown in the table on the right. **(c)** Resistivity values of the skin layer determine the strength of intracerebral gradients generated by a given stimulus intensity. Note that larger skin resistances (as in cadavers) result in larger intracerebral effect due to the smaller shunting effect of the skin. Green and orange boxes denote the range of live and post-mortem skin resistances, respectively, based on literature data. **(d)** Comparison of *in vivo* and *postmortem* conditions in rats. Induced voltage gradients *in vivo* and 1 to 5 days after death (12 recording sites, seven stimulus frequencies in 3 rats). The increased voltage gradients after death likely reflect the reduced shunting properties of the drying postmortem scalp.



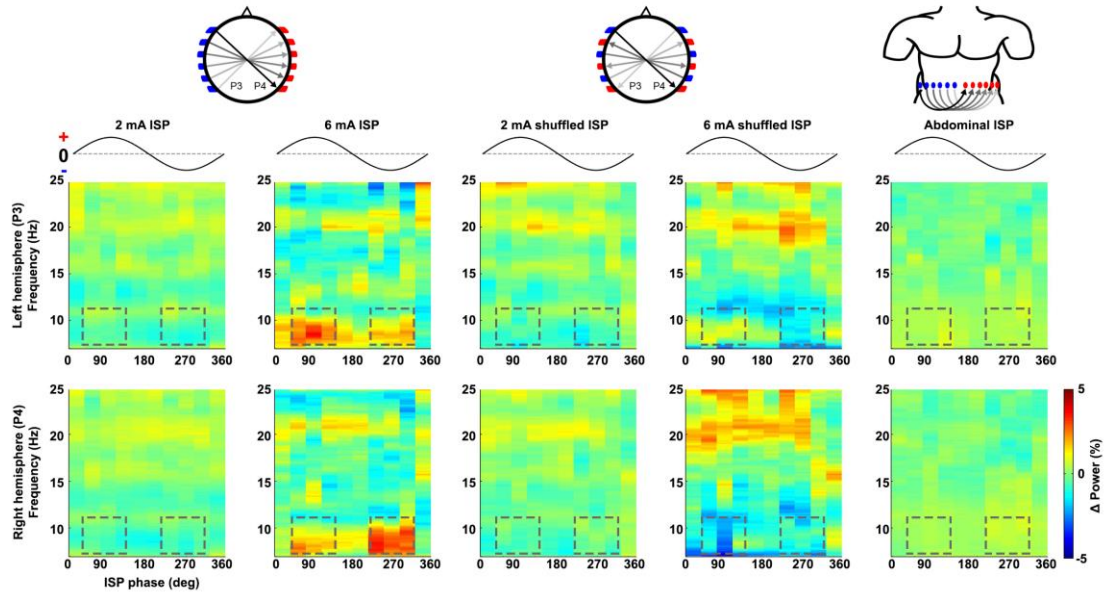

**Supplementary Figure 10. ISP stimulation-induced modulation of EEG.**

Panels represent ISP stimulus-induced phase-modulation of power in different frequency bands. Alpha power band is highlighted by squares. Each panel shows the difference between stimulation (5 min) and the preceding nonstimulated 1-min long control periods (as shown in Figure 8a). Note that anodal stimulation of the respective hemisphere at 6 mA ISP strongly increases alpha power, while shuffled ISP stimulation is much less effective (for quantification and statistics, see also Figure 8b). Power in the beta band is also increased by stimulation. Based on  $n = 6$  subjects. Abdominal wall stimulation (6 mA ISP) had no effect ( $n = 2$  subjects).

### Supplementary Results - Statistics Table

| Figure | Panel            | Test used                                                        | n           |                                                                 | Descriptive statistics shown                                                 | P value                                                                                                                 | Degree of freedom & F/t/z/R/etc values                                                                                 |
|--------|------------------|------------------------------------------------------------------|-------------|-----------------------------------------------------------------|------------------------------------------------------------------------------|-------------------------------------------------------------------------------------------------------------------------|------------------------------------------------------------------------------------------------------------------------|
|        |                  |                                                                  | Exact value | Definition                                                      |                                                                              |                                                                                                                         |                                                                                                                        |
| 1      | b top            | Mann and Whitney U test                                          | 20          | Modulated area from 4 rats                                      | Box plots with whiskers denote medians, interquartile ranges and full ranges | P = 0.0409                                                                                                              | Z = 2.0443                                                                                                             |
|        | b bottom         | Mann and Whitney U test                                          | 20          | Modulated area from 4 rats                                      |                                                                              | P = 0.0187                                                                                                              | Z = 2.3510                                                                                                             |
|        | e                | Paired t-test                                                    | 20          | 5 intensities from 4 rats                                       |                                                                              | P < 0.001                                                                                                               | t(19) = -19.5773                                                                                                       |
| 2      | a transcutaneous | Pearson's linear correlation                                     | 13          | Transmembrane potential change of 8 neurons with 13 intensities | Full dataset + error bars are mean ± SEM                                     | P = 0.002                                                                                                               | R = 0.8626                                                                                                             |
|        | a subcutaneous   | Pearson's linear correlation                                     | 13          | Transmembrane potential change of 9 neurons with 13 intensities |                                                                              | P < 0.001                                                                                                               | R = 0.9725                                                                                                             |
|        | a subcutaneous   | Paired t-test with Bonferroni correction for multiple comparison | 25          | Membrane potential difference values from 5 neurons in 4 rats   |                                                                              | P = 0.003, 0.004, 0.046, 0.14, 1.60, <0.001, <0.001, <0.001, for -800,-600,-400,-200, 200, 400, 600, 800 μA all vs 0 μA | t(24) = -4.61, -4.53, -3.45, -2.88, 1.58, 7.25, 7.35, 6.74, for -800,-600,-400,-200, 200, 400, 600, 800 μA all vs 0 μA |
|        | a transcutaneous | Paired t-test with Bonferroni correction for multiple comparison | 40          | Membrane potential difference values from 8 neurons in 3 rats   |                                                                              | P = 2.62, 2.57, 0.015, 0.091, 2.62, 0.044, 0.008, 0.003, for -800,-600,-400,-200, 200, 400, 600, 800 μA all vs 0 μA     | t(39) = -1.06, -1.15, -3.74, -2.99, 1.07, 3.35, 3.98, 4.37, for -800,-600,-400,-200, 200, 400, 600, 800 μA all vs 0 μA |

|          |                            |                                                                        |    |                                                        |                               |                                                                                                                                   |                                                                                                                                  |
|----------|----------------------------|------------------------------------------------------------------------|----|--------------------------------------------------------|-------------------------------|-----------------------------------------------------------------------------------------------------------------------------------|----------------------------------------------------------------------------------------------------------------------------------|
|          | <b>b</b><br>transcutaneous | Pearson's linear correlation                                           | 13 | Mean firing rate of 8 neurons with 13 intensities      |                               | P = 0.0075                                                                                                                        | R = 0.7956                                                                                                                       |
|          | <b>b</b><br>subcutaneous   | Pearson's linear correlation                                           | 13 | Mean firing rate of 9 neurons with 13 intensities      |                               | P < 0.001                                                                                                                         | R = 0.9542                                                                                                                       |
|          | <b>b</b><br>subcutaneous   | Paired t-test with Bonferroni correction for multiple comparison       | 25 | Firing rate difference values from 5 neurons in 4 rats |                               | P = 0.044, 0.028, 0.153, 0.33, 0.001, 0.065, <0.001, <0.001, for -800,-600,-400,-200, 200, 400, 600, 800 $\mu$ A all vs 0 $\mu$ A | t(24) = -3.49, -3.69, -2.84, -2.45, 5.02, 3.27, 6.08, 5.54, for -800,-600,-400,-200, 200, 400, 600, 800 $\mu$ A all vs 0 $\mu$ A |
|          | <b>b</b><br>transcutaneous | Paired t-test with Bonferroni correction for multiple comparison       | 35 | Firing rate difference values from 7 neurons in 3 rats |                               | P = 4.61, 4.42, 4.61, 1.60, 1.64, 0.15, 0.39, 0.046, for -800,-600,-400,-200, 200, 400, 600, 800 $\mu$ A all vs 0 $\mu$ A         | t(34) = 0.34, 0.16, -0.44, 1.58, 1.48, 2.74, 2.29, 3.31, for -800,-600,-400,-200, 200, 400, 600, 800 $\mu$ A all vs 0 $\mu$ A    |
|          | <b>c</b>                   | Mann-Whitney U-test with Bonferroni correction for multiple comparison | 30 | x 150 spectral power values for all nine conditions    | Error bars are mean $\pm$ SEM | Frequency bins significantly different from the control condition ( $p < 0.05$ ) are marked on the figure                         | Not shown                                                                                                                        |
|          | <b>d</b>                   | Mann-Whitney U-test with Bonferroni correction for multiple comparison | 35 | x 150 spectral power values for all nine conditions    |                               | Frequency bins significantly different from the control condition ( $p < 0.05$ ) are marked on the figure                         | Not shown                                                                                                                        |
| <b>3</b> | <b>d</b>                   | Wilcoxon signed rank test, two-sided                                   | 55 | Cells from 8 rats                                      | Full dataset shown            | P = 0.0014                                                                                                                        | Z = 3.2003                                                                                                                       |

|   |                      |                                           |                          |                                                                 |                                                                              |                        |                                                                                                                             |
|---|----------------------|-------------------------------------------|--------------------------|-----------------------------------------------------------------|------------------------------------------------------------------------------|------------------------|-----------------------------------------------------------------------------------------------------------------------------|
| 4 | e                    | Pearson's linear correlation              | 48                       | Gradient values from 4 cadavers                                 | Box plots with whiskers denote medians, interquartile ranges and full ranges | P < 0.001              | R = 0.5254                                                                                                                  |
|   | f                    | One-way ANOVA with Bonferroni corrections | 900                      | Gradient values from 5 cadavers                                 |                                                                              | P = 0.99               | F(8, 891) = 0.0667                                                                                                          |
|   | g                    | Paired t-test                             | 60                       | Gradient values from 2 cadavers                                 |                                                                              | P < 0.001 in all cases | t1(59) = -28.74;<br>t2(59) = -29.8515;<br>t3(59) = -22.541;<br>t4(59) = -21.5798;<br>t5(59) = -16.858;<br>t6(59) = -20.7634 |
| 5 | b                    | Pearson's linear correlation              | 14 (skin),<br>81 (skull) | Stimulus intensity values from 6 (skin) and 10 (skull) cadavers | Raw data and fitted line                                                     | P < 0.001 in all cases | R(skull) = 0.9231;<br>R(skin) = 0.8593                                                                                      |
|   | c                    | Pearson's linear correlation              | 29                       | Gradient values from 10 cadavers                                |                                                                              | P < 0.001              | R = 0.56                                                                                                                    |
|   | d                    | Pearson's linear correlation              | 16                       | Gradient values from 6 cadavers                                 |                                                                              | P < 0.001              | R = 0.8019                                                                                                                  |
|   | e<br>skin-vs. skull  | Paired t-test                             | 36                       | Gradient values from 6 cadavers                                 | Box plots with whiskers denote medians, interquartile ranges and full ranges | P < 0.001              | t(35) = -9.7634                                                                                                             |
|   | e<br>skull-vs. brain | Paired t-test                             | 60                       | Gradient values from 3 cadavers                                 |                                                                              | P < 0.001              | t(59) = -9.7461                                                                                                             |

|   |                          |                                                                  |      |                              |                                                                              |                                                                                      |                                                                                            |
|---|--------------------------|------------------------------------------------------------------|------|------------------------------|------------------------------------------------------------------------------|--------------------------------------------------------------------------------------|--------------------------------------------------------------------------------------------|
| 6 | <b>b</b><br>left         | Paired t-test with Bonferroni correction for multiple comparison | 45   | Trials from a single subject | Colormap of 500x6 medians (phases x intensities)                             | P = 1.811, 1.811, 0.08, <0.001, <0.001<br>for 1.5, 3, 4.5, 6, 7.5 mA,<br>all vs 0 mA | t(44) = 0.82, 0.92, 2.66, 5.07, 5.98<br>for 1.5, 3, 4.5, 6, 7.5 mA,<br>all vs 0 mA         |
|   | <b>b</b><br>right        | Paired t-test with Bonferroni correction for multiple comparison | 45   | Trials from a single subject | Colormap of 500x6 medians (phases x intensities)                             | P = 0.1, 1.65, 0.85, <0.001, <0.001<br>for 1.5, 3, 4.5, 6, 7.5 mA,<br>all vs 0 mA    | t(44) = -2.56, 0.8, 1.5, 6.14, 6.71<br>for 1.5, 3, 4.5, 6, 7.5 mA,<br>all vs 0 mA          |
|   | <b>c</b><br>left trough  | Paired t-test with Bonferroni correction for multiple comparison | 1025 | Trials from 18 subjects      | Box plots with whiskers denote medians, interquartile ranges and full ranges | P = 1.55, 3.89, 1.00, 0.006, <0.001<br>for 1.5, 3, 4.5, 6, 7.5 mA,<br>all vs 0 mA    | t(1024) = 1.41, 0.45, -1.73, -3.60, -10.13<br>for 1.5, 3, 4.5, 6, 7.5 mA,<br>all vs 0 mA   |
|   | <b>c</b><br>left peak    | Paired t-test with Bonferroni correction for multiple comparison | 1025 | Trials from 18 subjects      |                                                                              | P = 3.36, 0.22, 0.01, <0.001, <0.001<br>for 1.5, 3, 4.5, 6, 7.5 mA,<br>all vs 0 mA   | t(1024) = -0.70, -2.41, -3.35, -5.92, -7.29<br>for 1.5, 3, 4.5, 6, 7.5 mA,<br>all vs 0 mA  |
|   | <b>c</b><br>right peak   | Paired t-test with Bonferroni correction for multiple comparison | 1025 | Trials from 18 subjects      |                                                                              | P = 4.32, 2.60, 1.32, 0.58, <0.001<br>for 1.5, 3, 4.5, 6, 7.5 mA,<br>all vs 0 mA     | t(1024) = -0.17, -0.98, -1.55, -2.00, -7.04<br>for 1.5, 3, 4.5, 6, 7.5 mA,<br>all vs 0 mA  |
|   | <b>c</b><br>right trough | Paired t-test with Bonferroni correction for multiple comparison | 1025 | Trials from 18 subjects      |                                                                              | P = 1.81, 0.07, 0.01, <0.001, <0.001<br>for 1.5, 3, 4.5, 6, 7.5 mA,<br>all vs 0 mA   | t(1024) = -1.27, -2.85, -3.35, -8.97, -10.23<br>for 1.5, 3, 4.5, 6, 7.5 mA,<br>all vs 0 mA |

|   |   |                                                                           |                                                                                           |                                                                                                  |                               |                                                                                                                                                                                                                                                                                                                                                                                                                             |                                                                                                                                                                                                                                                                                                                                                                                                                                                                                        |
|---|---|---------------------------------------------------------------------------|-------------------------------------------------------------------------------------------|--------------------------------------------------------------------------------------------------|-------------------------------|-----------------------------------------------------------------------------------------------------------------------------------------------------------------------------------------------------------------------------------------------------------------------------------------------------------------------------------------------------------------------------------------------------------------------------|----------------------------------------------------------------------------------------------------------------------------------------------------------------------------------------------------------------------------------------------------------------------------------------------------------------------------------------------------------------------------------------------------------------------------------------------------------------------------------------|
| 7 | c | Paired t-test with Bonferroni correction for multiple comparison          | 405, 408, 405, 404, 408 for 0, 2, 4.5, 7, 9 mA                                            | Alpha power and gamma power values from a single subject                                         | Error bars are mean $\pm$ SEM | P(alpha) = 0.37, 0.42, <0.001, <0.001;<br>P(control) = 1.38, 1.38, 0.31, 0.62 for 2, 4.5, 7, 9 mA all vs 0 mA;                                                                                                                                                                                                                                                                                                              | Alpha: t(811) = -1.92, t(808) = -1.81, t(807) = 6.01, t(811) = 11.72;<br>Control: t(811) = -0.94, t(808) = -0.92, t(807) = 2.06, t(811) = 1.53; for 2, 4.5, 7, 9 mA all vs 0 mA;                                                                                                                                                                                                                                                                                                       |
|   | d | One-way ANOVA with Bonferroni correction                                  | 388x8, 391x8, 394x8, 393x8, 396x8, 394x8 for 'Pre0', 2, 4.5, 7, 9, 'Post0' mA intensities | Alpha power values from a single subject                                                         |                               | P = 0.87, 0.85, 0.014, <0.001, <0.001, 0.14 for 'Pre0', 2, 4.5, 7, 9, 'Post0' mA intensities                                                                                                                                                                                                                                                                                                                                | F(7,3096) = 0.44;<br>F(7,3120) = 1.00;<br>F(7,3140) = 3.033;<br>F(7,3136) = 6.96;<br>F(7,3160) = 14.37;<br>F(7,3144) = 2.03;<br>for 'Pre0', 2, 4.5, 7, 9, 'Post0' mA intensities                                                                                                                                                                                                                                                                                                       |
|   | d | Post-hoc paired t-test with Bonferroni correction for multiple comparison | 388x8, 391x8, 394x8, 393x8, 396x8, 394x8 for 'Pre0', 2, 4.5, 7, 9, 'Post0' mA intensities | Alpha power values from a single subject                                                         |                               | P(Pre0) = 5.25, 5.69, 6.05, 5.89, 5.81, 1.77, 6.33, 6.67;<br>P(2 mA) = 6.03, 1.37, 5.5, 4.96, 6.67, 5.86, 6.16, 1.93;<br>P(4.5 mA) = 1.03, 0.005, 4.59, 2.42, 0.57, 2.56, 5.86, 5.69;<br>P(7 mA) = 5.8, 0.002, 0.53, 6.16, 0.78, 0.57, 0.005, 2.98;<br>P(9 mA) = 3.11, <0.001, <0.001, 5.06, 0.82, 6.10, 3.87, 1.86;<br>P(Post0) = 6.33, 5.52, 2.01, 0.76, 5.25, 6.10, 1.19, 1.48 for 45, 90, 135, 180, 225, 270, 360° each | T(387) = -1.29, -1.21, -0.69, 1.06, 1.03, -0.03, -0.73, -0.43 ('Pre0');<br>T(390) = 0.40, 2.07, 0.35, 1.35, 0.430, 0.65, -0.90, -1.88 (2 mA);<br>T(393) = 2.21, 3.90, -0.29, -1.75, -2.48, 0.14, -0.90, 1.20 (4.5 mA);<br>T(392) = -1.02, 4.09, 2.51, 0.91, 2.34, -2.47, -3.91, -1.63 (7 mA);<br>T(395) = -0.18, 7.56, 7.26, 0.30, 2.30, 1.09, -0.28, -1.91 (9 mA);<br>T(393) = -0.75, 1.18, 1.85, 2.35, 1.30, -1.08, -2.14, -2.02 ('Post0') for 45, 90, 135, 180, 225, 270, 360° each |
|   | f | Two sample Kolmogorov-Smirnov test                                        | 16, 10, 8, 18, 10, 12                                                                     | Modulation vector lengths for 'Oppe', 2, 4.5, 7, 9 and 'Opost' intensities from a single subject |                               | P=0.98, 0.041, <0.001, 0.019, 0.17 for 2, 4.5, 7, 9 and 'O Post0' intensities all vs. 'pre0'                                                                                                                                                                                                                                                                                                                                | D = 0.17, 0.56, 0.81, 0.57, 0.39 for 2, 4.5, 7, 9 and 'post0' intensities all vs. 'pre0'                                                                                                                                                                                                                                                                                                                                                                                               |
|   | g | Paired t-test                                                             | 23                                                                                        | Trials from a single subject                                                                     |                               | P = 0.96, 0.79, 0.44, 0.44, 0.74, 0.11 for 0, 1.5, 3, 4.5, 6, 7.5 mA                                                                                                                                                                                                                                                                                                                                                        | t(22) = 0.044, -0.26, 0.78, 0.77, -0.32, -1.63 for 0, 1.5, 3, 4.5, 6, 7.5 mA                                                                                                                                                                                                                                                                                                                                                                                                           |

|               |                   |                                                                      |                                                         |                                                                  |                                              |                                                                                                                                    |                                                                                                                                               |
|---------------|-------------------|----------------------------------------------------------------------|---------------------------------------------------------|------------------------------------------------------------------|----------------------------------------------|------------------------------------------------------------------------------------------------------------------------------------|-----------------------------------------------------------------------------------------------------------------------------------------------|
| <b>8</b>      | <b>b</b><br>left  | One sample t-test with Bonferroni correction for multiple comparison | 809                                                     | Power difference values for all conditions                       | Full dataset & error bars are mean $\pm$ SEM | P = 0.36, <0.005, 1.68, <0.005, 0.41 for the five L-R conditions and P = 1.06, <0.005 1.52, 1.29, 0.39 for the five R-L conditions | t(807) = 2.09, 16.47, 0.45, 6.47, 1.85 for the five L-R conditions and t(807) = -1.56, 13.21, -1.02, 0.33, 1.95 for the five R-L conditions   |
|               | <b>b</b><br>right | One sample t-test with Bonferroni correction for multiple comparison | 809                                                     | Power difference values for all conditions                       |                                              | P = 2.22, <0.005, 2.22, 0.16, 1.68 for the five L-R conditions and P = 1.45, <0.005, 1.50, 1.45, 1.14 for the five R-L conditions  | t(807) = -0.57, 12.00, 0.59, -2.43, 1.38 for the five L-R conditions and t(807) = -1.33, 18.17, 1.14, -1.32, 1.59 for the five R-L conditions |
|               | <b>c</b><br>left  | Mann and Whitney U test with Bonferroni correction                   | 125, 144, 117, 126, 127, 148 and 211                    | x 500 spectral power values for the seven consecutive conditions | Error bars are mean $\pm$ SEM                | Frequency bins significantly different from open-eye conditions (p < 0.05) are marked on the figure                                | Not shown                                                                                                                                     |
|               | <b>c</b><br>right | Mann and Whitney U test with Bonferroni correction                   | 125, 144, 117, 126, 127, 148 and 211                    | x 500 spectral power values for the seven consecutive conditions |                                              | Frequency bins significantly different from open-eye conditions (p < 0.05) are marked on the figure                                | Not shown                                                                                                                                     |
| <b>Supp 1</b> | <b>c</b>          | Pearson's linear correlation                                         | 3053, 3092, 3098 for 0, 2 and 9 ma stimulus intensities | Instantaneous alpha frequency values from a single subject       | Full distributions are shown in dot plots    | P = 0.89, 0.57 and 0.82 for 0, 2 and 9 mA stimulus intensities                                                                     | R = -0.0024, 0.01 and -0.004 for 0, 2 and 9 mA stimulus intensities                                                                           |
| <b>Supp 4</b> | <b>c</b>          | Mann and Whitney U test                                              | 10                                                      | Gradient values from 2 cadavers                                  | Error bars are mean $\pm$ SEM                | P = 0.1212                                                                                                                         | Z = 1.5497                                                                                                                                    |
| <b>Supp 8</b> | <b>i</b>          | Pearson's linear correlation                                         | 128                                                     | Gradient values in cortex from 8 cadavers                        | Median and the interquartile range           | P = 0.00833                                                                                                                        | R = -0.232                                                                                                                                    |
